# Supplementary material for: CCL19 has potential to be a prognostic biomarker and a modulator of tumor immune microenvironment (TIME) of breast cancer: a comprehensive analysis based on TCGA database
Source: Research Square preprint supplement (doi:10.21203/rs.3.rs-87457/v1), 2020-10-09
Supplement: Supplementary file 1 [file 60c4352eb4dde1baf4e30742.docx]

Supplement Table 6: The difference test and correlation test between the expression of CCL19 and TICs.

| TICs | Correlation Test (p-value) | Difference Test (p-value) |
| --- | --- | --- |
| Macrophages M2 | <0.001 | <0.001 |
| T cells CD8 | <0.001 | <0.001 |
| Macrophages M1 | <0.001 | <0.001 |
| Macrophages M0 | <0.001 | <0.001 |
| T cells gamma delta | <0.001 | <0.001 |
| T cells CD4 memory activated | <0.001 | <0.001 |
| B cells naive | <0.001 | <0.001 |
| T cells CD4 memory resting | <0.001 | <0.001 |
| Dendritic cells resting | <0.001 | <0.001 |
| NK cells resting | <0.001 | <0.001 |
| B cells memory | <0.001 | <0.001 |
| Mast cells activated | <0.001 | <0.001 |
| T cells regulatory (Tregs) | <0.001 | >0.05 |
| T cells follicular helper | 0.001 | <0.001 |
| Dendritic cells activated | 0.012 | <0.001 |
| Neutrophils | <0.001 | <0.001 |
